# Supplementary material for: Intrinsically electroactive polyimide microspheres fabricated by electrospraying technology for ascorbic acid detection
Source: Royal Society of Chemistry journal article supplement (doi:10.1039/c1jm12422f), 2011-01-01
Supplement: c1jm12422f.pdf [file c1jm12422f.pdf]

# Intrinsically Electroactive Polyimide Microspheres

## Fabricated by Electrospraying Technology for

### Ascorbic Acid Detection

Chang-Jian Weng, Yu-Sian Jhuo, Ya-Lun Chen, Chun-Fang Feng, Chi-Hao Chang,  
Shao-Wen Chen, Jui-Ming Yeh and Yen Wei

## Supporting Information

S-table 1 Solubility of electroactive poly(amic acid)

| Compound code   | Solvents |      |     |     |                   |             |             |              |                           |                            |                           |
|-----------------|----------|------|-----|-----|-------------------|-------------|-------------|--------------|---------------------------|----------------------------|---------------------------|
|                 | NMP      | DMAc | DMF | THF | CHCl <sub>3</sub> | NMP/<br>THF | DMF/<br>THF | DMAc/<br>THF | NMP/<br>CHCl <sub>3</sub> | DMAc/<br>CHCl <sub>3</sub> | DMF/<br>CHCl <sub>3</sub> |
| Poly(amic acid) | ++       | ++   | ++  | ±   | ±                 | ++          | ++          | ++           | ±                         | ±                          | ±                         |

<sup>a</sup> Qualitative solubility was tested with 1mg of a sample in 1ml of stirred solvent.  
++ = soluble at room temperature. ; ± = partially soluble.

|            | DMAc/THF                                                                            | NMP/THF                                                                              | DMF/THF                                                                               |
|------------|-------------------------------------------------------------------------------------|--------------------------------------------------------------------------------------|---------------------------------------------------------------------------------------|
| solubility | good                                                                                | good                                                                                 | good                                                                                  |
|            | 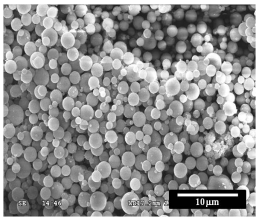 |  |  |
| Morphology | Good                                                                                | Bad                                                                                  | Bad                                                                                   |

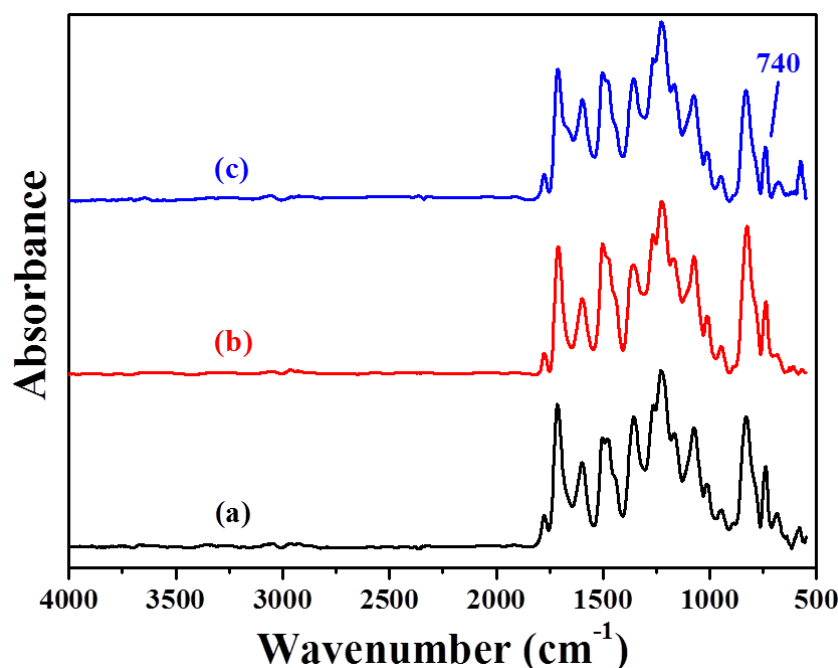

S-Fig 1 (a) EPS un-treatment (b) EPS exposed to HCl vapor for 5 mins (b) EPS exposed to NH<sub>3</sub> vapor for 5 mins.

In order to confirm the stability of electroactive polyimide sphere which was synthesized by reacting ACAT and 4,4'-(4,4'-isopropylidene-diphenoxy)-bis(phthalic anhydride) (BSAA) under acidic or basic conditions, we design an experiment to prove it. The EPS sample was exposed to HCl vapor and NH<sub>3</sub> vapor for 5 min, respectively. After removing the residual HCl or NH<sub>3</sub> on the surface of EPS sample by water and in 120°C oven for 1h. We confirmed the EPS chemical structure by FT-IR (ATR). The result was as shown in S-Fig1:

If the EPS underwent hydrolyze after exposed with HCl or NH<sub>3</sub> vapor, the imide ring peak of EPSS at 740 cm<sup>-1</sup> will disappear or decay and the -OH peak will appear. Compared with EPS without any treatment (S-Fig. 1(a)), the imide ring peak of EPS which was treated with acid (S-Fig. 1(b)) and base (S-Fig. 1(c)) almost didn't decay and the OH peak didn't appear. According to FTIR results, we consider that EPS was stability when it was under acidic or basic conditions.
